# Supplementary material
Source: PubMed Central journal article supplement (PMC3387339)
Supplement: NIHMS368310-supplement-5.pdf [file NIHMS368310-supplement-5.pdf]

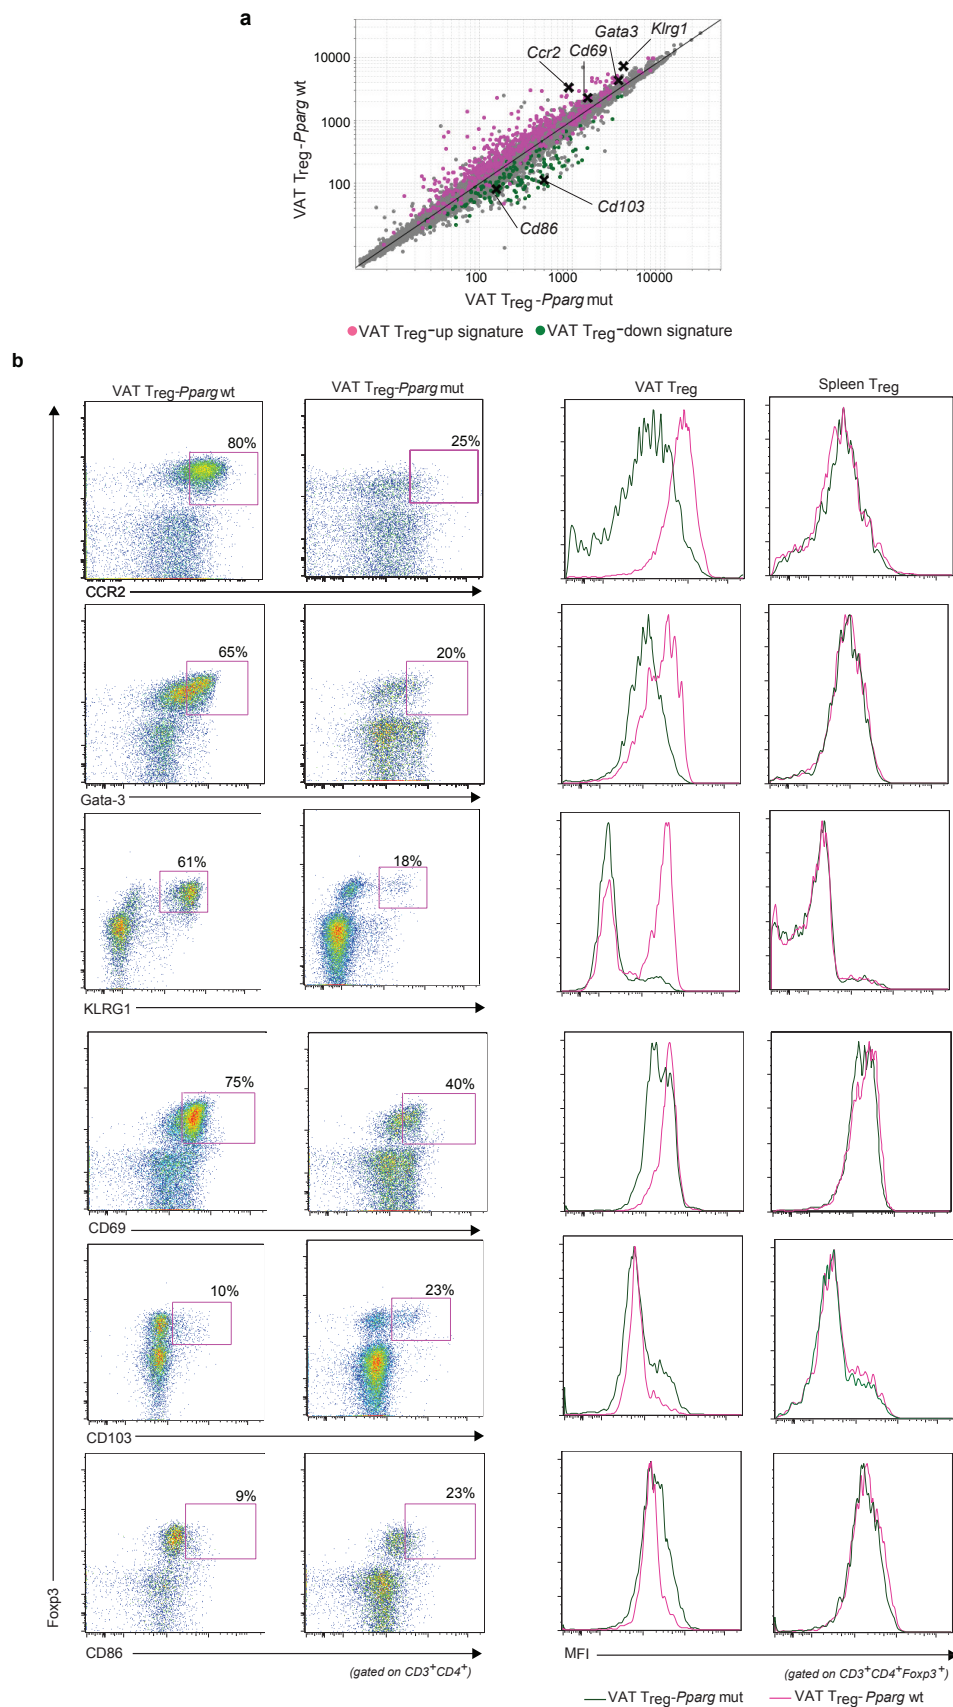

**Suppl. Fig. S4: Protein-level differences in VAT vs lymphoid T<sub>regs</sub> in wt vs mutant mice. (a)** Comparison plot of normalized expression values for transcripts isolated from epididymal fat T<sub>regs</sub> from *Pparg* wt (y axis) versus T<sub>reg</sub>-*Pparg* mut (x axis) mice. Genes from the VAT T<sub>reg</sub> up- and down-signature are highlighted in pink and green, respectively. Transcripts encoding the proteins analyzed are indicated. **(b)** T<sub>reg</sub> protein differences. Cells were isolated from the epididymal fat SVF of 25-week-old wt or mutant mice. They were stained for CD45, CD3, CD4, and Foxp3 as well as CCR2, Gata-3, KLRG1, CD103, CD69 or CD86, and were analyzed by flow cytometry. T<sub>regs</sub> were gated as CD3<sup>+</sup>CD4<sup>+</sup>Foxp3<sup>+</sup>. Left half, representative dot plots for VAT CD4<sup>+</sup>CD3<sup>+</sup> cells from wt (left) vs mutant (right) mice. Right half, histograms of T<sub>reg</sub> expression of the indicated proteins: VAT at left, spleen at right; wt as pink, mutant as green. MFIs for wt VAT, mutant VAT, wt spleen, mutant spleen, respectively, are: CCR2: 10900±1500, 4900±916, 814±130, 802±85; Gata-3: 3600±301, 2000±310, 1100±167, 1100±110; KLRG1: 2270±450, 630±180, 230±20, 247±27; CD69: 3210±730, 2190±290, 1957±350, 1990±103; CD103: 940±78, 1360±160, 231±20, 263±60; CD86: 1480±330, 2194±190, 2080±525, 2420±615.
